# Supplementary material for: Integrin Mechano-chemical Signaling Generates Plasma Membrane Nanodomains that Promote Cell Spreading
Source: PubMed Central journal article supplement (PMC6879320; doi:10.1016/j.cell.2019.04.037), 2019-05-16
Supplement: EMS84939-supplement-Table_S1.pdf [file EMS84939-supplement-Table_S1.pdf]

**Cell, Volume 177**

**Supplemental Information**

**Integrin Mechano-chemical Signaling**

**Generates Plasma Membrane Nanodomains**

**that Promote Cell Spreading**

**Joseph Mathew Kalappurakkal, Anupama Ambika Anilkumar, Chandrima Patra, Thomas S. van Zanten, Michael P. Sheetz, and Satyajit Mayor**

**Table S1:** Mobile fractions of cRGD conjugated Neutravidin DyLight 650 on various surfaces; Related to STAR Methods, Preparation of cRGD functionalized Supported Lipid Bilayers (SLBs).

| <b>cRGD bound to Neutravidin DyLight 650</b> | <b>Mobile Fraction</b>                |
|----------------------------------------------|---------------------------------------|
|                                              | <b>Mean <math>\pm</math> SD (N=2)</b> |
| <b>Continuous SLBs</b>                       | 0.902 $\pm$ 0.02                      |
| <b>Nanopatterned SLBs</b>                    | 0.148 $\pm$ 0.019                     |
| <b>PLL-g-PEG coated Glass</b>                | 0.091 $\pm$ 0.006                     |
