# Supplementary material for: Integrin Mechano-chemical Signaling Generates Plasma Membrane Nanodomains that Promote Cell Spreading
Source: PubMed Central journal article supplement (PMC6879320; doi:10.1016/j.cell.2019.04.037), 2019-05-16
Supplement: EMS84939-supplement-Table_S2.pdf [file EMS84939-supplement-Table_S2.pdf]

**Table S2:** Quantitative measurements (pmoles/ $\mu$ g of protein) of phospholipid species in WT, PGAP2/3 mutant and Rescue CHO cells; Related to STAR Methods, Mass Spectrometry

| Lipid Species  |    | WT       | PGAP2/3 mutant | Rescue   |
|----------------|----|----------|----------------|----------|
| PI(27:3e)      | PI | 0.125563 | 0.113835       | 0.080251 |
| PI(38:6)       | PI | 0.868918 | 0.867472       | 0.821913 |
| PI(19:2)       | PI | 0.853849 | 0.808515       | 0.849968 |
| sPI(24:6/14:1) | PI | 1.220225 | 1.291897       | 1.210407 |
| PI(18:1/20:4)  | PI | 0.532498 | 0.515193       | 0.530848 |
| PI(38:5)       | PI | 0.555556 | 0.511464       | 0.546388 |
| PI(38:3)       | PI | 0.097476 | 0.093842       | 0.090076 |
| PI(34:6p)      | PI | 0.38199  | 0.333103       | 0.369383 |
| PI(33:1p)      | PI | 0.432825 | 0.400921       | 0.430856 |

| Lipid Species |    | WT       | PGAP2/3 mutant | Rescue   |
|---------------|----|----------|----------------|----------|
| PS(27:0p)     | PS | 0.601937 | 0.599336       | 0.599991 |
| PS(29:2e)     | PS | 0.615304 | 0.613274       | 0.61196  |
| PS(36:3p)     | PS | 0.582513 | 0.57958        | 0.581684 |
| PS(44:10)     | PS | 0.184758 | 0.118314       | 0.12227  |
| PS(18:1/18:1) | PS | 0.140208 | 0.113078       | 0.097644 |
| PS(40:5)      | PS | 2.058949 | 2.051079       | 2.051539 |
| PS(17:0/17:0) | PS | 0.580006 | 0.578871       | 0.576012 |
| PS(40:4)      | PS | 0.416677 | 0.311655       | 0.330858 |
| PS(18:0/18:1) | PS | 4.210633 | 4.188382       | 4.207938 |
| PS(38:1p)     | PS | 0.357987 | 0.323507       | 0.356884 |
| PS(38:2e)     | PS | 0.296373 | 0.291156       | 0.212621 |
| PS(40:2)      | PS | 0.639532 | 0.614241       | 0.611264 |
| PS(40:0)      | PS | 0.118904 | 0.14816        | 0.111733 |
| PS(42:2)      | PS | 0.534892 | 0.534627       | 0.53391  |
| PS(34:1/8:0)  | PS | 0.998981 | 0.991286       | 0.989176 |

| Lipid Species  |    | WT          | PGAP2/3 mutant | Rescue      |
|----------------|----|-------------|----------------|-------------|
| PE(16:2/22:5)  | PE | 0.178700488 | 0.178242651    | 0.178100763 |
| PE(18:1p/20:4) | PE | 1.380253659 | 1.379484726    | 1.377938015 |
| PE(18:2p/20:5) | PE | 0.197303415 | 0.196874083    | 0.197296366 |
| PE(24:5/18:2)  | PE | 0.101756098 | 0.101731182    | 0.101536122 |
| PE(36:2p)      | PE | 0.189955122 | 0.189688761    | 0.18952284  |
| PE(36:4)       | PE | 0.194025366 | 0.193664707    | 0.193540519 |
| PE(37:3)       | PE | 1.166552195 | 1.165643804    | 1.166293924 |

|               |    |             |             |             |
|---------------|----|-------------|-------------|-------------|
| PE(37:4)      | PE | 1.158821463 | 1.15767147  | 1.158744183 |
| PE(37:4)      | PE | 1.841365854 | 1.835346782 | 1.84089771  |
| PE(38:4)      | PE | 0.169685854 | 0.169330259 | 0.169241221 |
| PE(40:4)      | PE | 1.129045854 | 1.128251566 | 1.128847664 |
| PE(40:7)      | PE | 1.105771707 | 1.104953199 | 1.105378321 |
| PE(41:4)      | PE | 1.244019512 | 1.241306436 | 1.243161527 |
| PE(41:6)      | PE | 1.332995122 | 1.331279539 | 1.332598107 |
| PE(43:2)      | PE | 1.159067317 | 1.157974063 | 1.158448366 |
| PE(43:4)      | PE | 1.572839024 | 1.572372719 | 1.571396641 |
| PE(45:6)      | PE | 0.166134634 | 0.166121422 | 0.166036183 |
| PE(45:8)      | PE | 0.4008      | 0.400312085 | 0.400266076 |
| PE(8:0e/10:0) | PE | 0.16313     | 0.151858    | 0.134369    |

| Lipid Species |    | WT       | PGAP2/3 mutant | Rescue   |
|---------------|----|----------|----------------|----------|
| PC(10:0/21:1) | PC | 0.395368 | 0.31066        | 0.377856 |
| PC(13:1/21:2) | PC | 0.507177 | 0.417399       | 0.375112 |
| PC(16:1/18:1) | PC | 7.838852 | 7.780404       | 7.809166 |
| PC(18:2/20:4) | PC | 1.190752 | 1.165202       | 1.185957 |
| PC(18:4/22:2) | PC | 0.344968 | 0.33304        | 0.272525 |
| PC(18:4/22:3) | PC | 0.341788 | 0.450498       | 0.472123 |
| PC(19:1/18:1) | PC | 0.753792 | 0.705917       | 0.584523 |
| PC(20:1/18:3) | PC | 1.093133 | 1.03925        | 0.78479  |
| PC(24:3/16:2) | PC | 0.40124  | 0.456649       | 0.487511 |
| PC(32:2)      | PC | 0.317811 | 0.277124       | 0.248439 |
| PC(34:2e)     | PC | 0.775811 | 0.724663       | 0.599911 |
| PC(35:2)      | PC | 1.186103 | 1.176977       | 1.185716 |
| PC(36:2)      | PC | 12.82743 | 12.72759       | 12.79822 |
| PC(36:3)      | PC | 2.862502 | 2.85413        | 2.854215 |
| PC(36:4)      | PC | 3.077801 | 3.059988       | 2.803568 |
| PC(36:4)      | PC | 3.410537 | 3.396013       | 3.397703 |
| PC(38:2)      | PC | 2.038738 | 2.037047       | 2.033363 |
| PC(38:3)      | PC | 0.727858 | 0.684827       | 0.61463  |
| PC(38:4)      | PC | 0.614337 | 0.59256        | 0.483497 |
| PC(38:5)      | PC | 2.084733 | 2.082645       | 2.069492 |
| PC(38:6e)     | PC | 0.701191 | 0.676626       | 0.684389 |
| PC(38:7)      | PC | 0.31145  | 0.354716       | 0.299955 |
| PC(40:6p)     | PC | 0.247594 | 0.220826       | 0.158698 |
| PC(8:0/10:0)  | PC | 0.526505 | 0.426479       | 0.448483 |
