# Supplementary material for: Integrin Mechano-chemical Signaling Generates Plasma Membrane Nanodomains that Promote Cell Spreading
Source: PubMed Central journal article supplement (PMC6879320; doi:10.1016/j.cell.2019.04.037), 2019-05-16
Supplement: EMS84939-supplement-Table_S3.pdf [file EMS84939-supplement-Table_S3.pdf]

**Table S3:** Characterization of causes for the variability in EA-TIRFM anisotropy values; Related to STAR Methods; Steady-state fluorescence emission anisotropy measurements and analysis

**Effect of Effective Numerical Aperture (NA) on emission anisotropy:**

| Microscope configuration | Effective NA | Anisotropy value on FN | Anisotropy value after m $\beta$ CD treatment | Relative Aniso change | Calculated FRET efficiency (Fraction) |
|--------------------------|--------------|------------------------|-----------------------------------------------|-----------------------|---------------------------------------|
| <b>100X/TIRF</b>         | 1.1          | 0.1739<br>(0.005)      | 0.1896<br>(0.005)                             | 0.0157                | 0.25                                  |
| <b>100X/TIRF</b>         | 0.85         | 0.1917<br>(0.005)      | 0.218<br>(0.004)                              | 0.0263                | 0.37                                  |
| <b>100X/Confocal</b>     | 0.73         | 0.1926<br>(0.006)      | 0.226<br>(0.01)                               | 0.034                 | 0.37                                  |

**Effect of probe photophysical properties on emission anisotropy:**

| Probe used                         | Mean anisotropy value in cells (SD) | Mean anisotropy value in Vinculin add back cells (SD) | Relative anisotropy change |
|------------------------------------|-------------------------------------|-------------------------------------------------------|----------------------------|
| <b>GFP-GPI (Figure 5B)</b>         | 0.146 (0.006)                       | 0.098<br>(0.003)                                      | 0.048                      |
| <b>GFP-GPI (Figure S6B)</b>        | 0.165<br>(0.006)                    | 0.099<br>(0.005)                                      | 0.066                      |
| <b>Alexa-568-FLAER (Figure 5F)</b> | 0.115<br>(0.003)                    | 0.065<br>(0.003)                                      | 0.050                      |
| <b>mRuby2-GPI (Figure 6D)</b>      | 0.192 (0.0092)                      | 0.157 (0.0032)                                        | 0.035                      |
| <b>mRuby2-GPI (Figure S5E)</b>     | 0.185 (0.0045)                      | 0.138 (0.0063)                                        | 0.047                      |

---

| <b>Probe used</b>          | <b>Mean anisotropy value of cells on FN (SD)</b> | <b>Mean anisotropy value of cells on FN after m<math>\beta</math>CD treatment (SD)</b> | <b>Relative anisotropy change</b> |
|----------------------------|--------------------------------------------------|----------------------------------------------------------------------------------------|-----------------------------------|
| <b>GFP-GPI (Figure1D)</b>  | 0.159 (0.002)                                    | 0.182 (0.004)                                                                          | 0.0233                            |
| <b>YFP-GPI (Figure 1F)</b> | 0.174 (0.005)                                    | 0.189 (0.005)                                                                          | 0.0157                            |

---
